# Supplementary material for: Ce3+self-doped CeOx/FeOCl: an efficient Fenton catalyst for phenol degradation under mild conditions
Source: Royal Society of Chemistry journal article supplement (doi:10.1039/c8dt04269a), 2019-01-01
Supplement: c8dt04269a1.pdf [file c8dt04269a1.pdf]

## Ce<sup>3+</sup> Self-Doped CeO<sub>x</sub>/FeOCl: An Efficient Fenton Catalyst for Phenol Degradation Under Mild Conditions

Jian Zhang<sup>a\*</sup>, Mengxue Yang<sup>a</sup>, Ye Lian<sup>a</sup>, Mingliang Zhong<sup>a</sup>, Jingquan Sha<sup>a</sup>, Guodong Liu<sup>a\*</sup>, Xinfu Zhao<sup>b\*</sup> and Shaojie Liu<sup>c</sup>

<sup>a</sup> Department of chemistry and chemical engineering, Jining University, Qufu 273100, P. R. China

<sup>b</sup> Shandong provincial key laboratory for special silicone-containing materials, Advanced materials institute, QiLu University of Technology (Shandong Academy of Sciences), Jinan 250100, P. R. China

<sup>c</sup> Department of Chemistry and Chemical Engineering, Shandong University, Jinan 250100, P. R. China

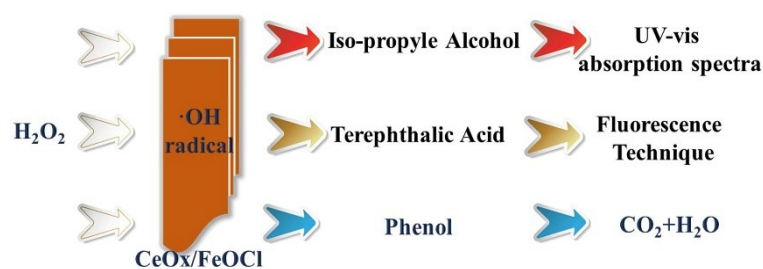

Fig.S1 schema of the catalytic reactions process

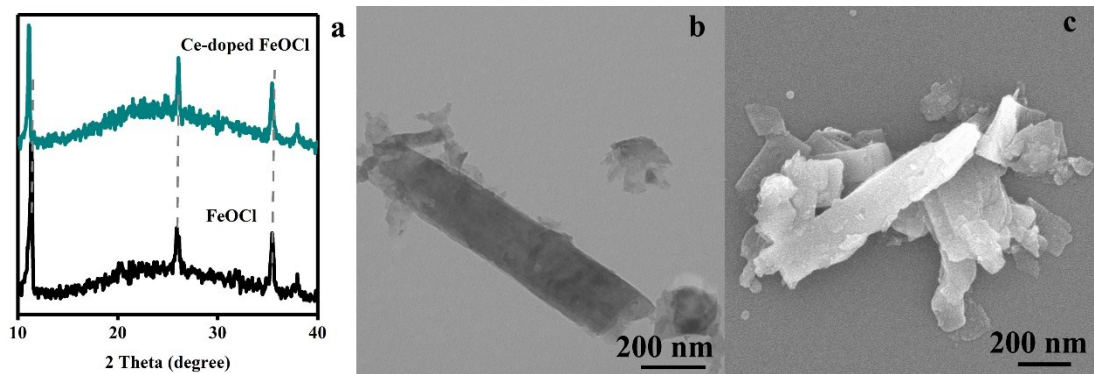

Fig.S2 (a) XRD patterns of FeOCl and CeOx/FeOCl, (b) TEM image and (c) SEM image of FeOCl

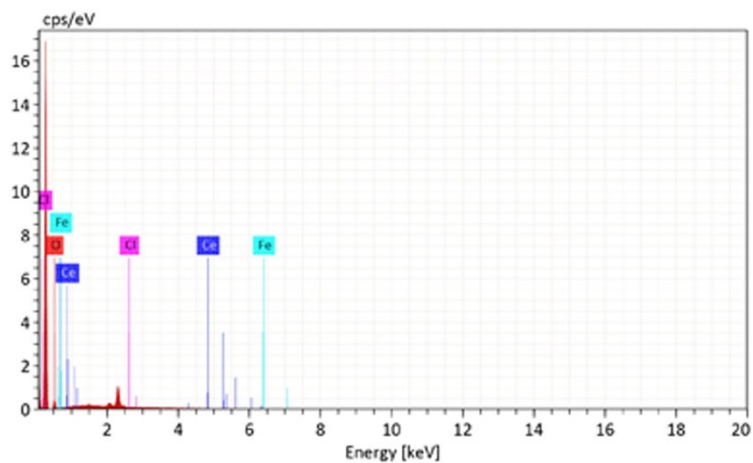

Fig.S3 EDS spectrum of CeOx/FeOCl

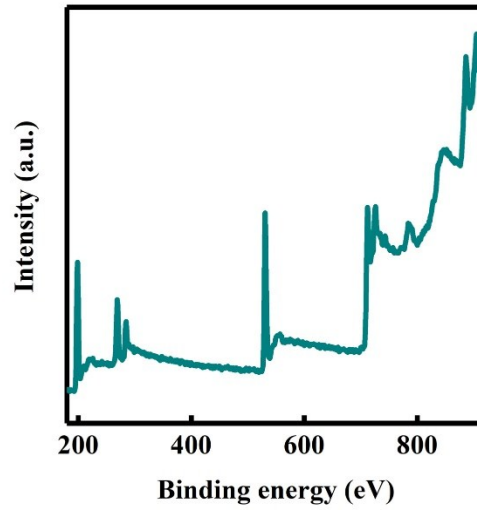

Fig.S4 XPS spectrums of CeO<sub>x</sub>/FeOCl

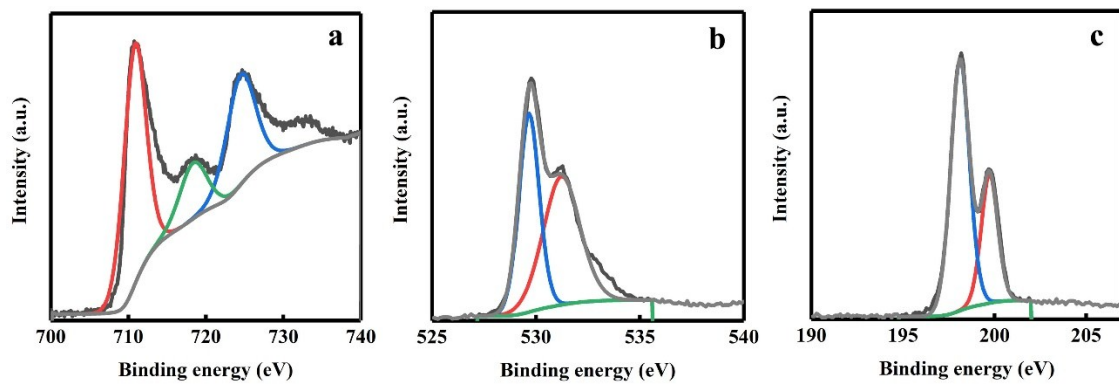

Fig.S5 XPS spectrums of (a) Fe 2p, (b) O 1s and (c) Cl 2p of FeOCl

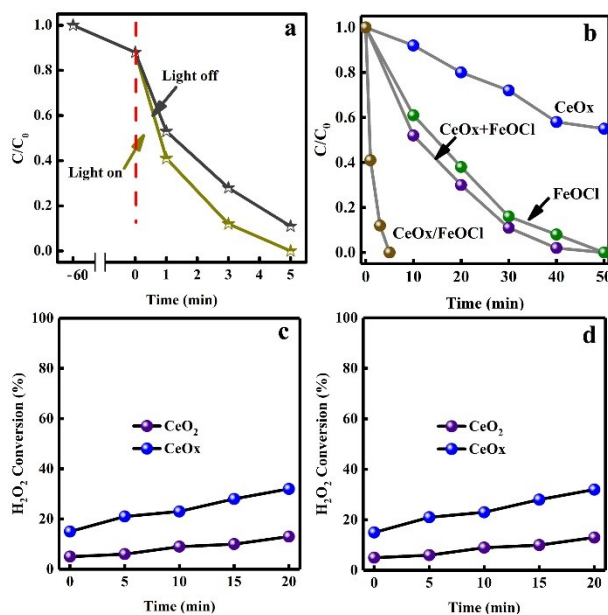

Fig.S6 (a) catalytic degradation of phenol over CeOx/FeOCl in the Fenton reaction, (b) Fenton catalytic activity of CeOx, FeOCl, FeOCl+CeOx and CeOx/FeOCl, (c) H<sub>2</sub>O<sub>2</sub> decomposition over CeO<sub>2</sub> and CeOx, (d) H<sub>2</sub>O<sub>2</sub> decomposition over CeO<sub>2</sub> and CeOx

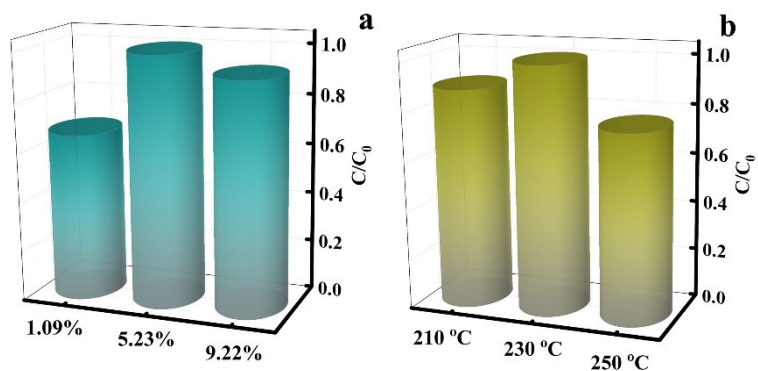

Fig.S7 catalytic degradation rate over CeOx/FeOCl with different (a) Ce content and (b) calcination temperature

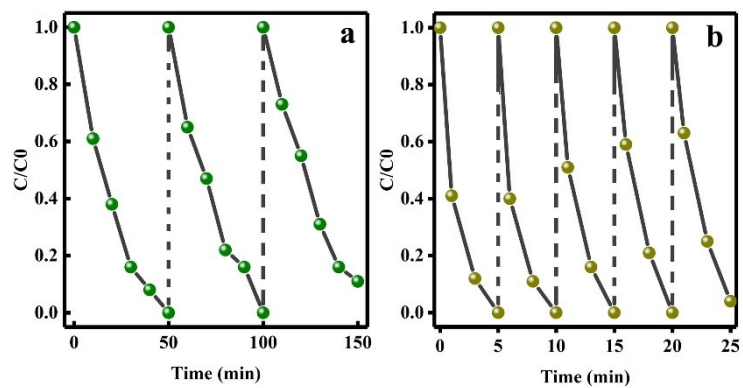

Fig.S8 Cycling degradation performance of (a) FeOCl and (b) CeOx/FeOCl

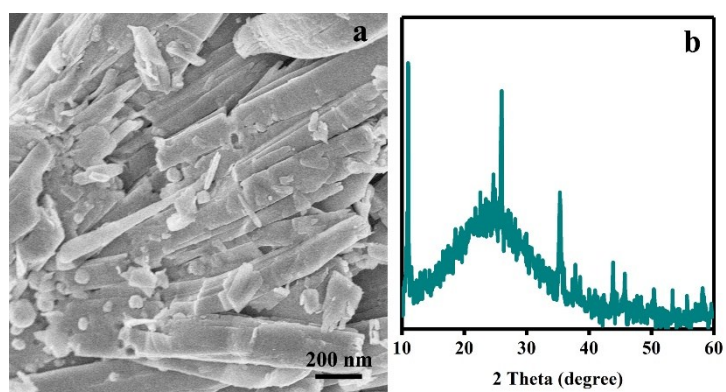

Fig.S9 (a) SEM image and (b) XRD pattern of CeOx/FeOCl after degradation

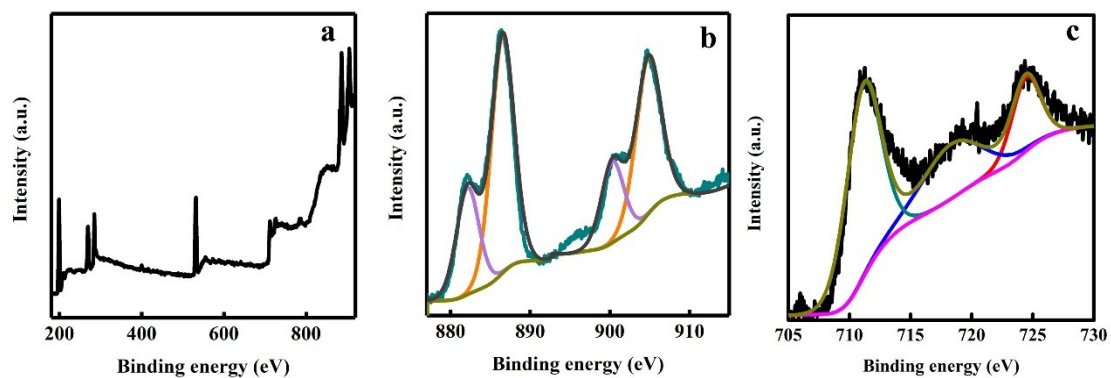

Fig.S10 XPS of (a) CeOx/FeOCl, (b) Ce 3d and (c) Fe 2p

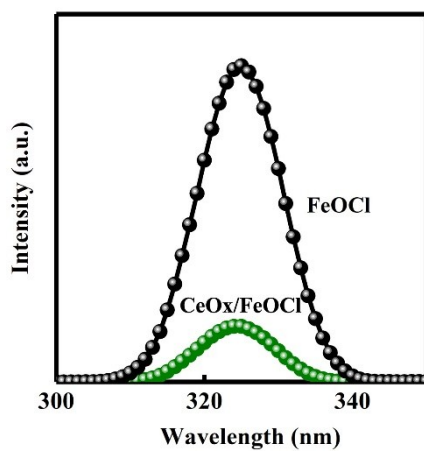

Fig.S11 PL emission intensities of FeOCl and CeOx/FeOCl

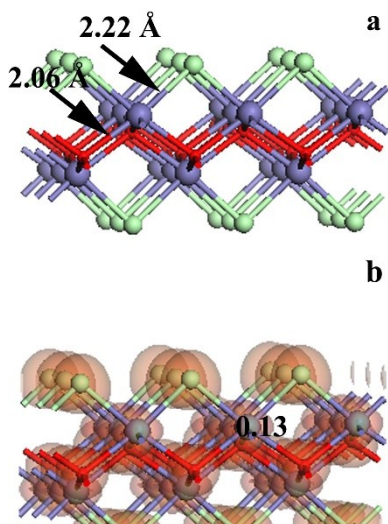

Fig.S12 (a) optimized structures and (b) total charge densities of FeOCl. The isosurface level is 0.8.

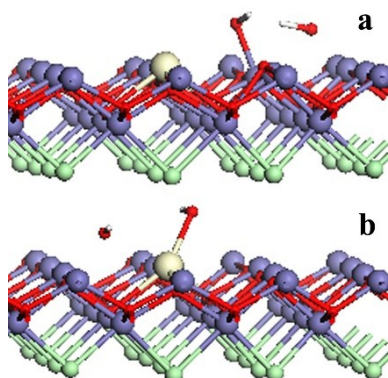

Fig.S13 optimized structures of H<sub>2</sub>O<sub>2</sub> on CeOx/FeOCl with (a) Fe-site and (b) Ce-site
